# Supplementary material for: RETRACTED: Alcohol drinking alters stress response to predator odor via BNST kappa opioid receptor signaling in male mice
Source: eLife journal article supplement (doi:10.7554/elife.59709), 2020-07-21
Supplement: supp [file elife-59709-supp-v1.zip]

Archive with 8 entries (8 files):
- elife_poa_e59709_Figure_1_figure_supplement_1.pdf
- elife_poa_e59709_Figure_1_figure_supplement_2.pdf
- elife_poa_e59709_Figure_3_figure_supplement_1.pdf
- elife_poa_e59709_Figure_4_figure_supplement_1.pdf
- elife_poa_e59709_Figure_5_figure_supplement_1.pdf
- elife_poa_e59709_Figure_6_figure_supplement_1.pdf
- elife_poa_e59709_Figure_7_figure_supplement_1.pdf
- elife_poa_e59709_Transparent_Reporting_File.pdf
