# Supplementary material for: RETRACTED: Alcohol drinking alters stress response to predator odor via BNST kappa opioid receptor signaling in male mice
Source: eLife journal article supplement (doi:10.7554/elife.59709), 2020-07-21
Supplement: supp [file elife-59709-supp-v1.zip › elife_poa_e59709_Figure_5_figure_supplement_1.pdf]

Figure 5 Suppl 1

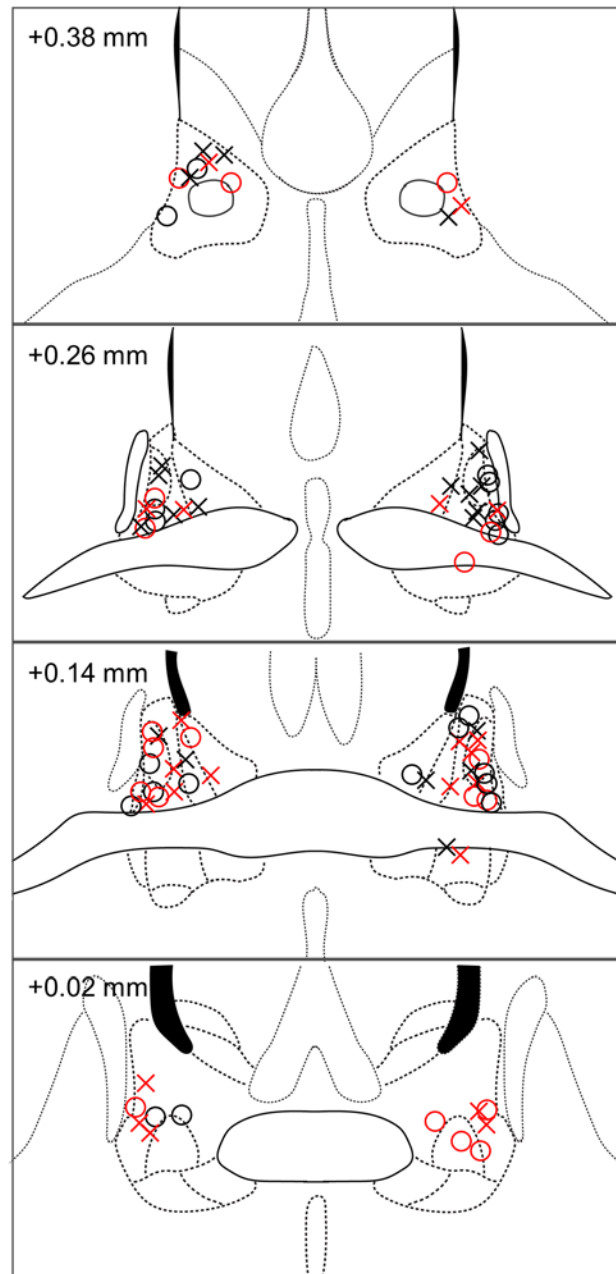

*Pdyn<sup>lox/lox</sup>*

Injection Center

○ H<sub>2</sub>O GFP

× H<sub>2</sub>O Cre-GFP

○ EtOH GFP

× EtOH Cre-GFP
