# Supplementary figures and images for: RETRACTED: Alcohol drinking alters stress response to predator odor via BNST kappa opioid receptor signaling in male mice
Source: eLife journal article supplement (doi:10.7554/elife.59709), 2020-07-21

Figure 1 Suppl 1

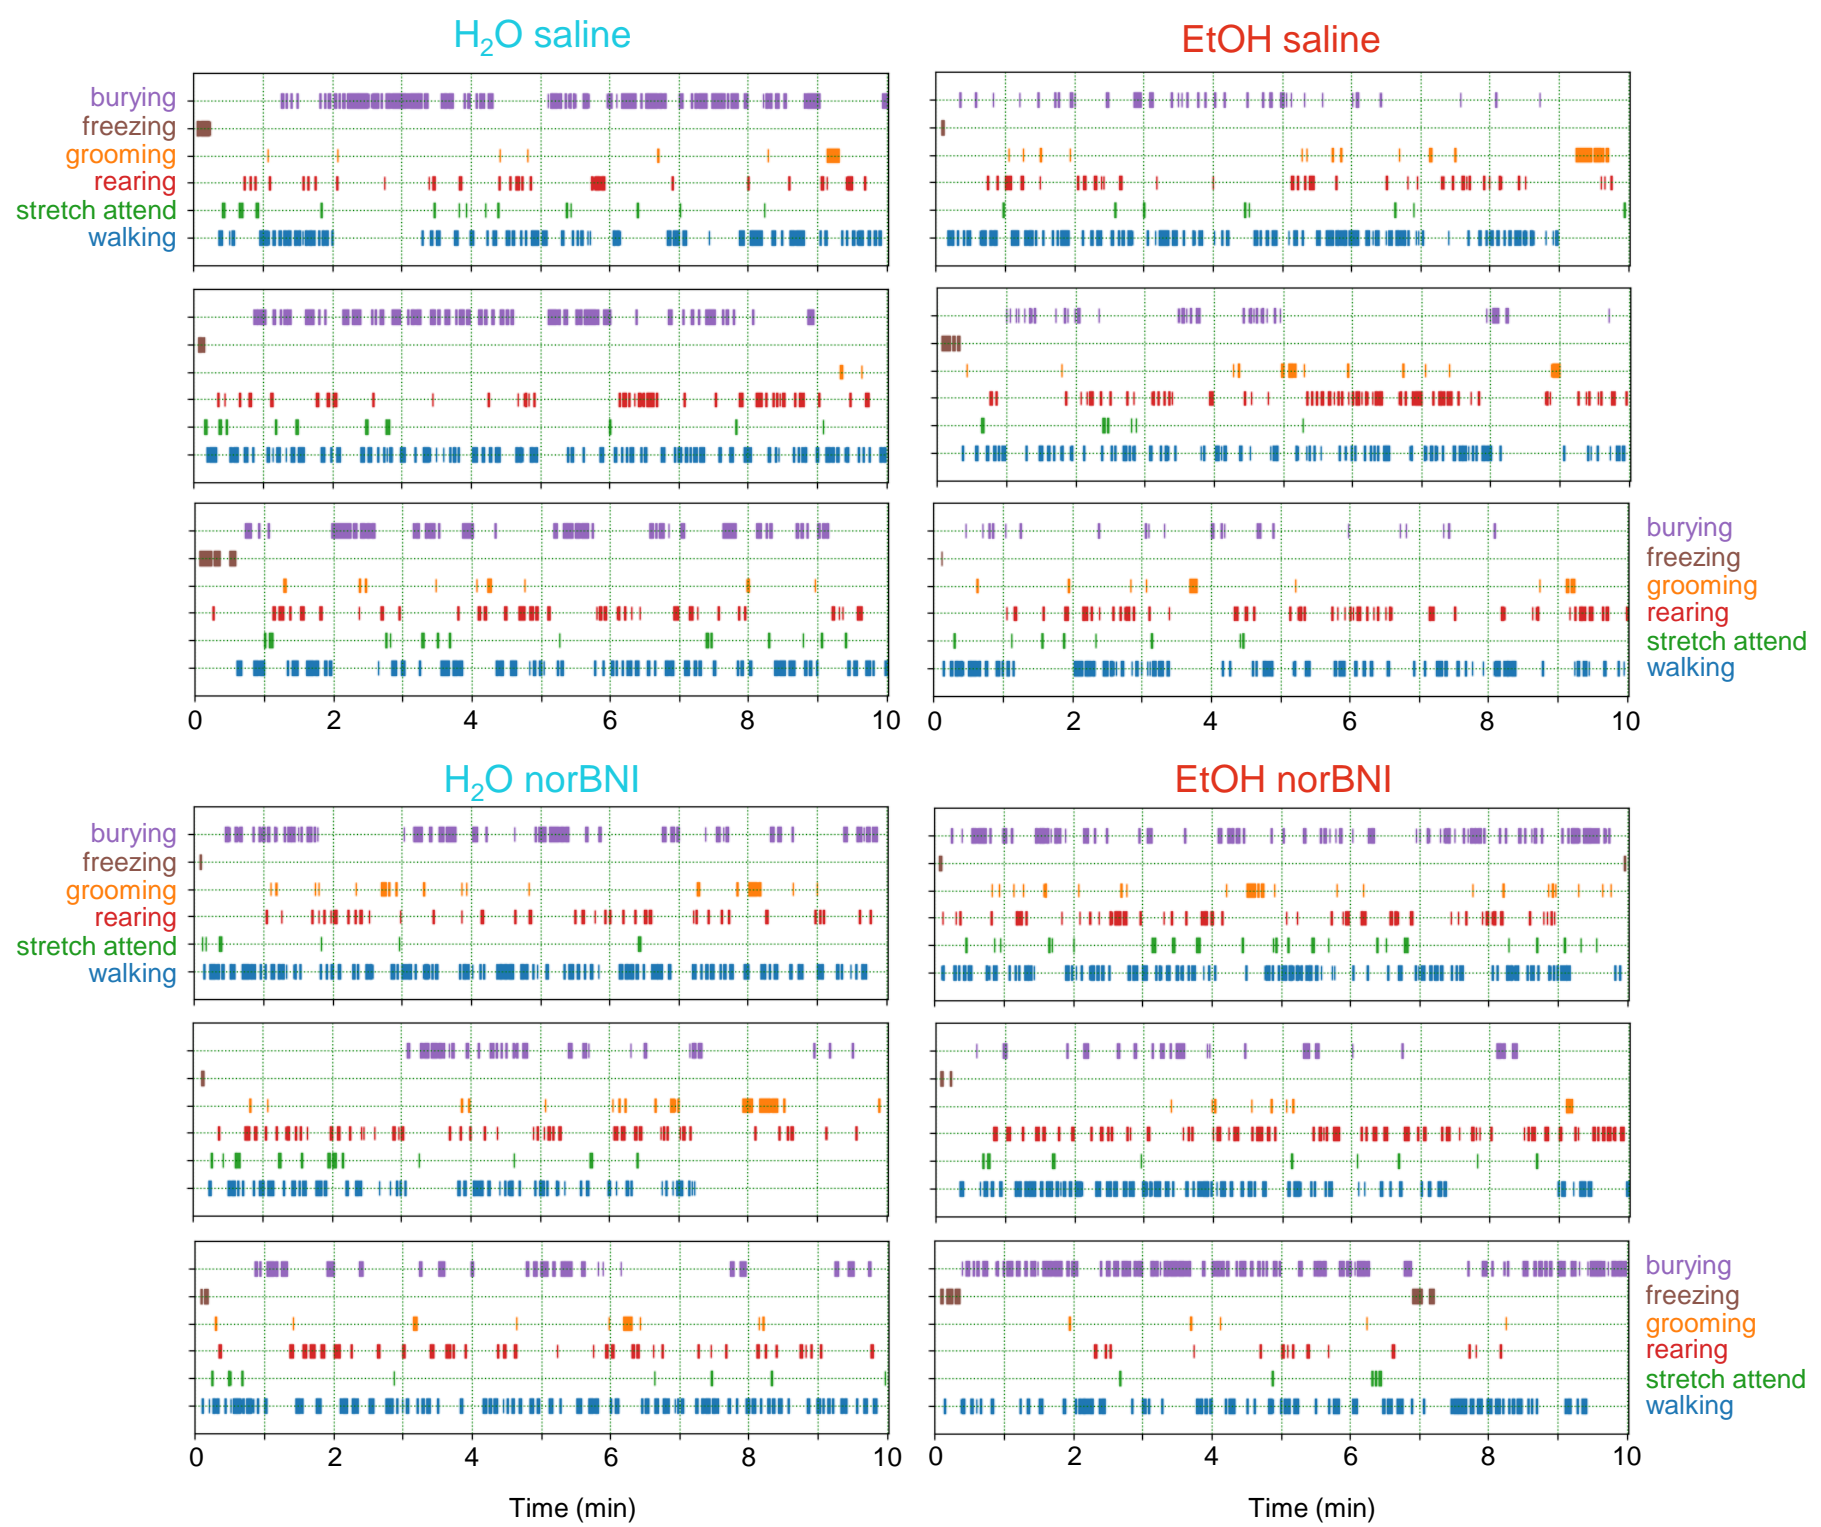

Supplement: supp [file elife-59709-supp-v1.zip › elife_poa_e59709_Figure_1_figure_supplement_1.pdf]

Figure 1 Suppl 2

A

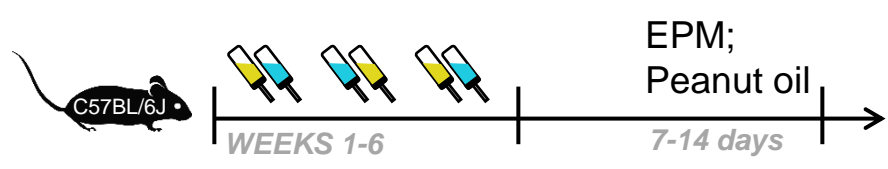

B

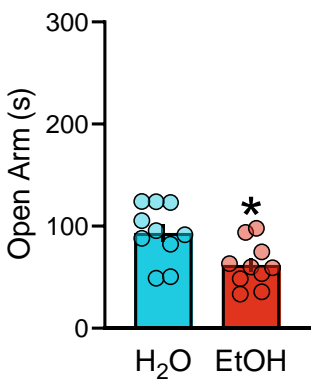

C

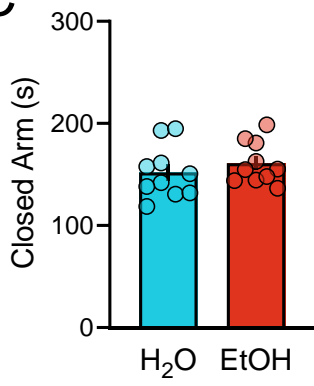

D

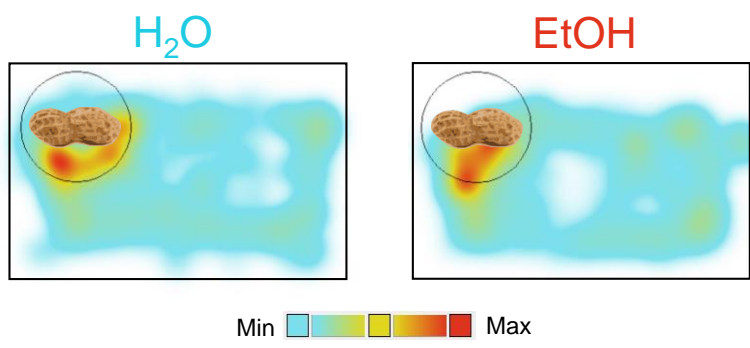

E

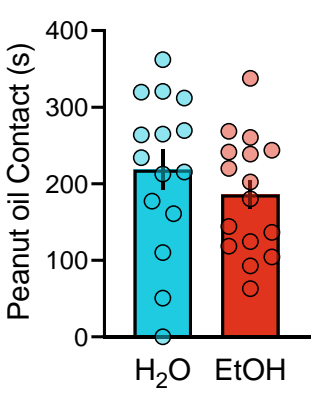

F

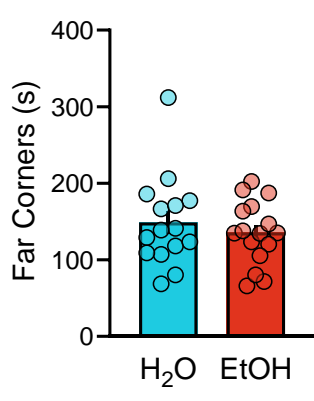

Supplement: supp [file elife-59709-supp-v1.zip › elife_poa_e59709_Figure_1_figure_supplement_2.pdf]

Fig 3 Suppl 1

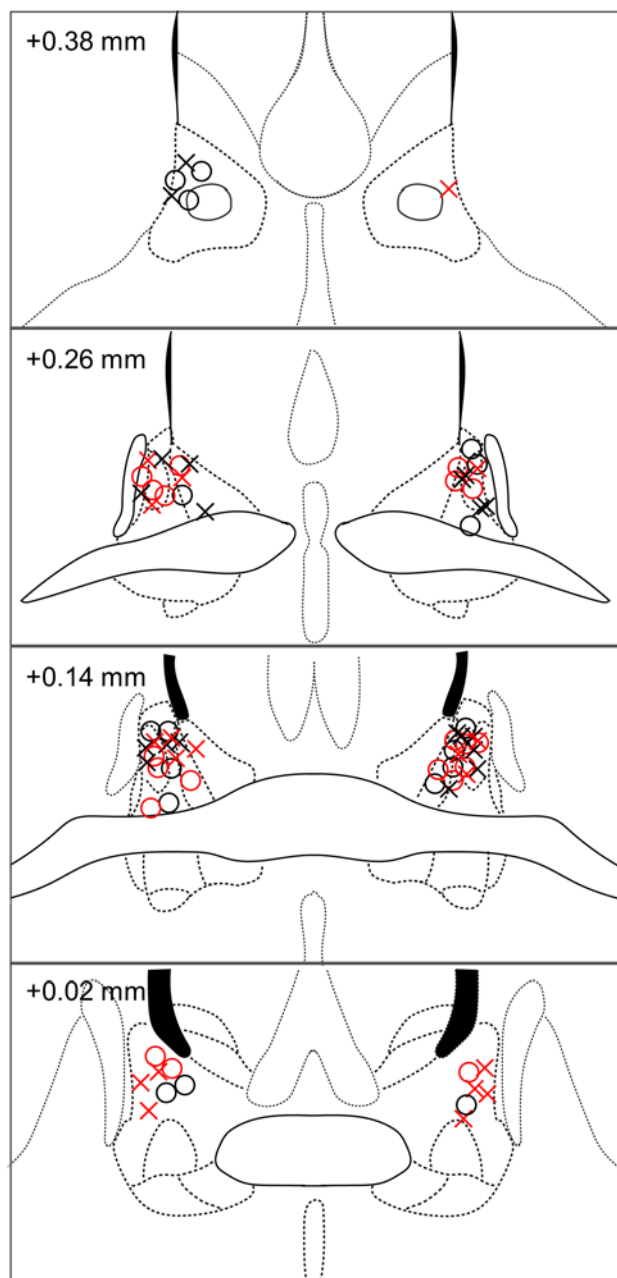

NorBNI  
Injection Center  
 ○ H<sub>2</sub>O PBS  
 X H<sub>2</sub>O norBNI  
 ○ EtOH PBS  
 X EtOH norBNI

Supplement: supp [file elife-59709-supp-v1.zip › elife_poa_e59709_Figure_3_figure_supplement_1.pdf]

Figure 4 Suppl 1

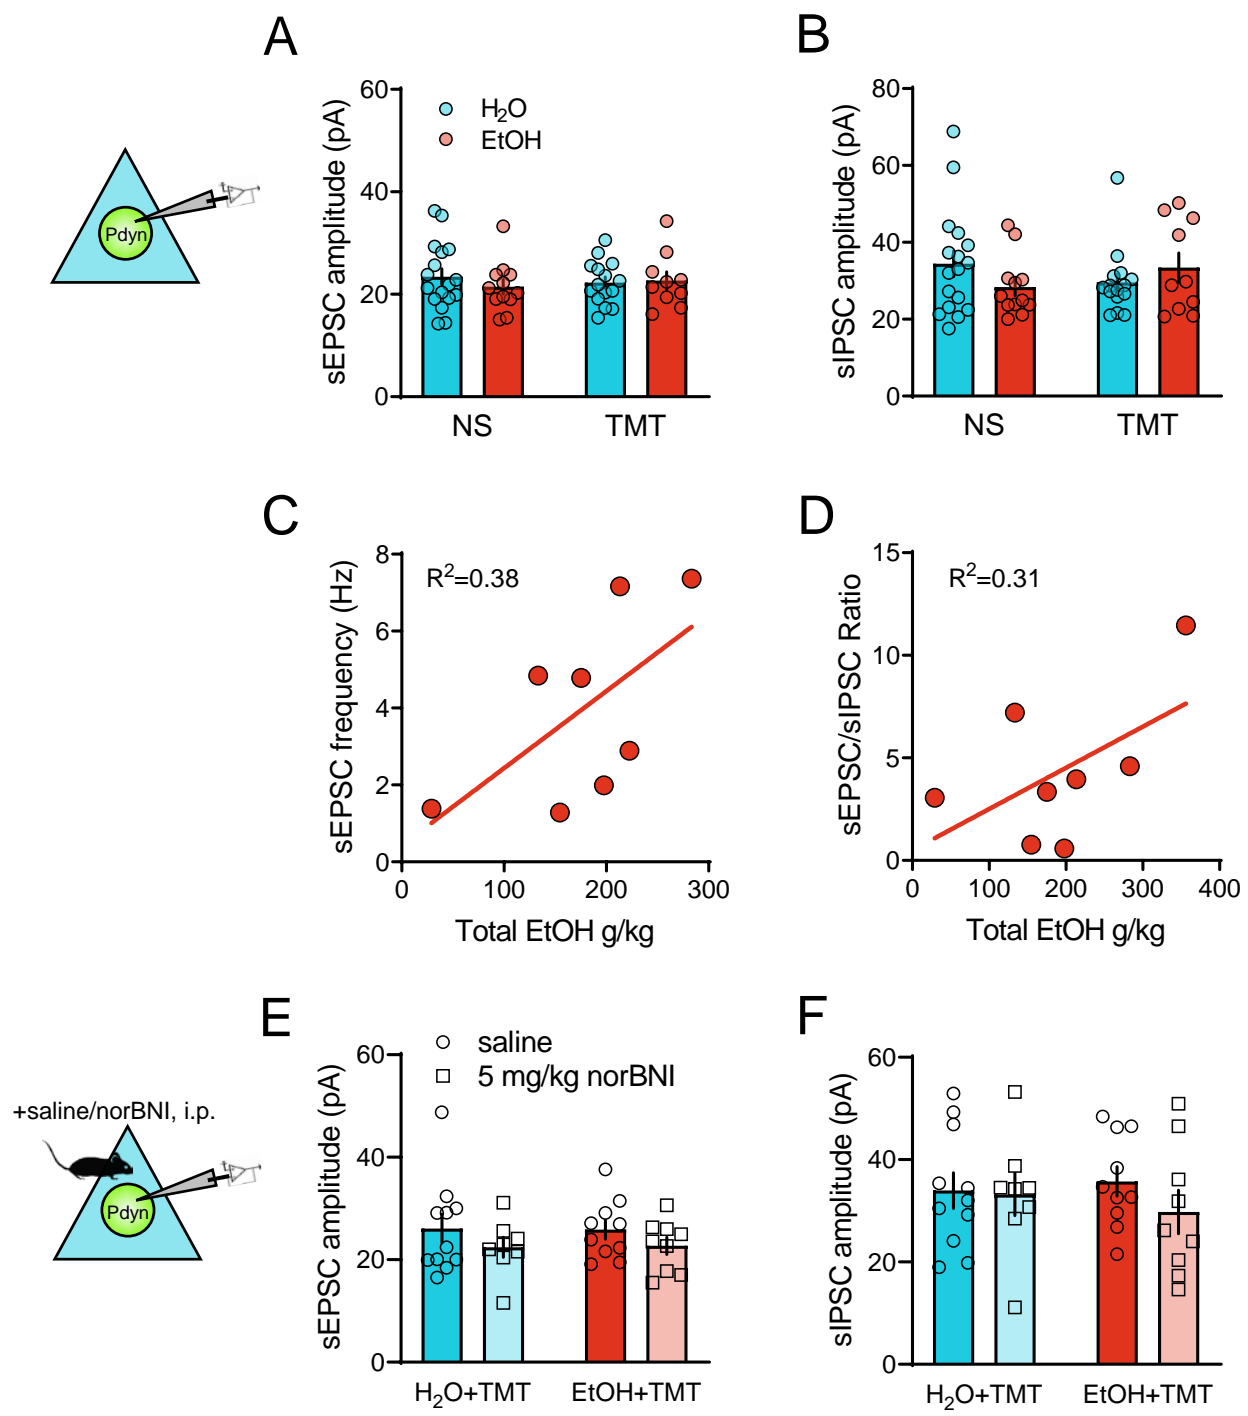

Supplement: supp [file elife-59709-supp-v1.zip › elife_poa_e59709_Figure_4_figure_supplement_1.pdf]

Figure 6 Suppl 1

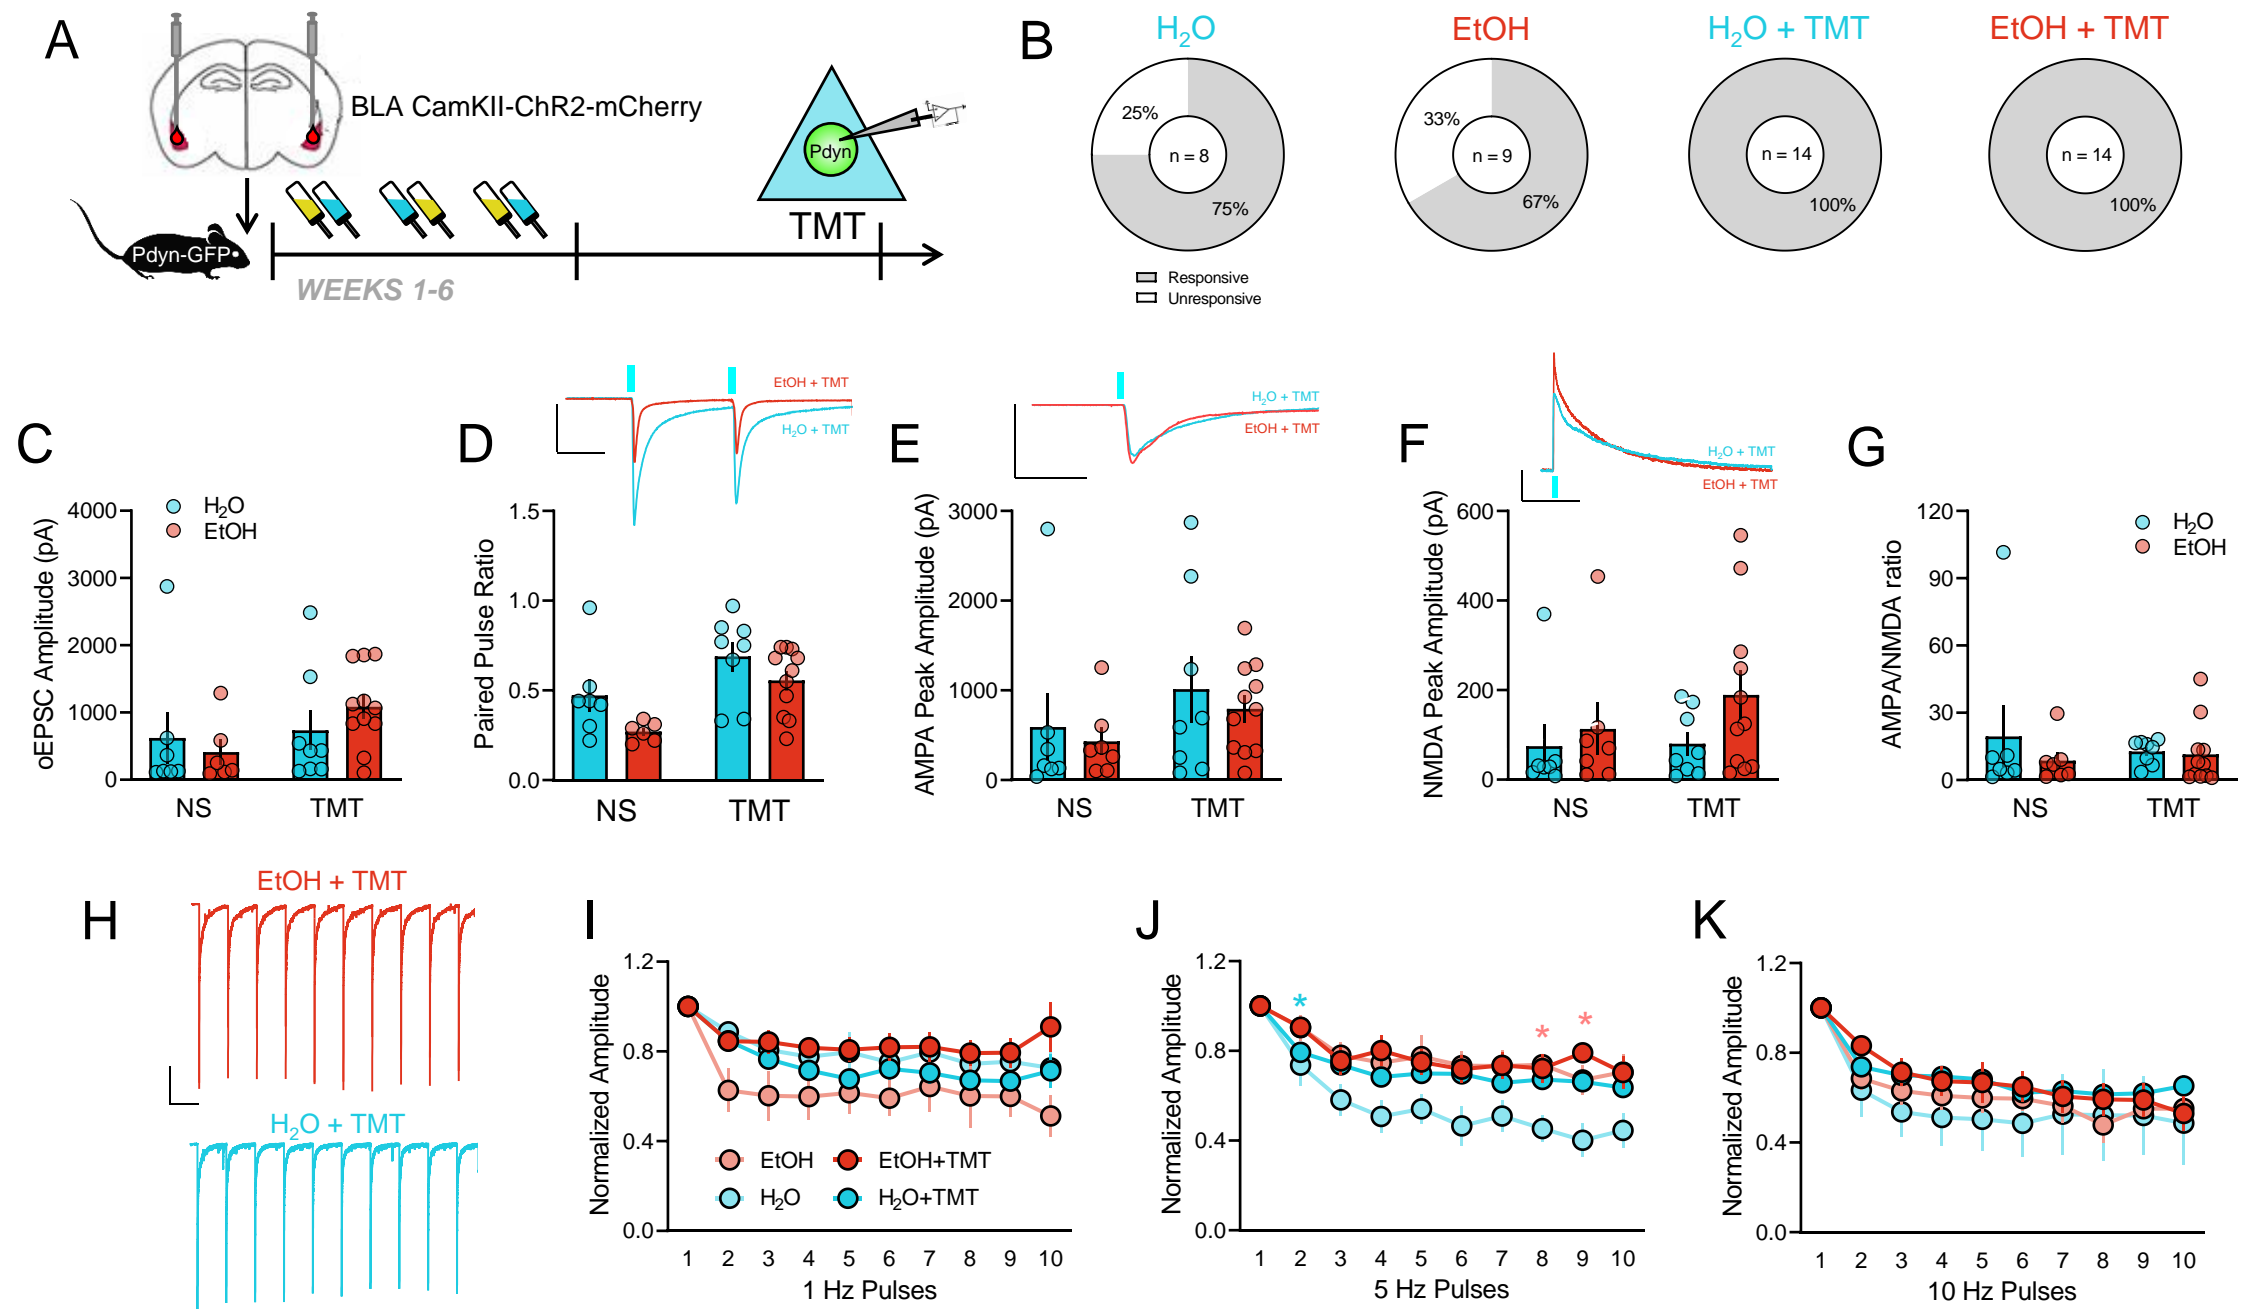

Supplement: supp [file elife-59709-supp-v1.zip › elife_poa_e59709_Figure_6_figure_supplement_1.pdf]

Figure 7 Suppl 1

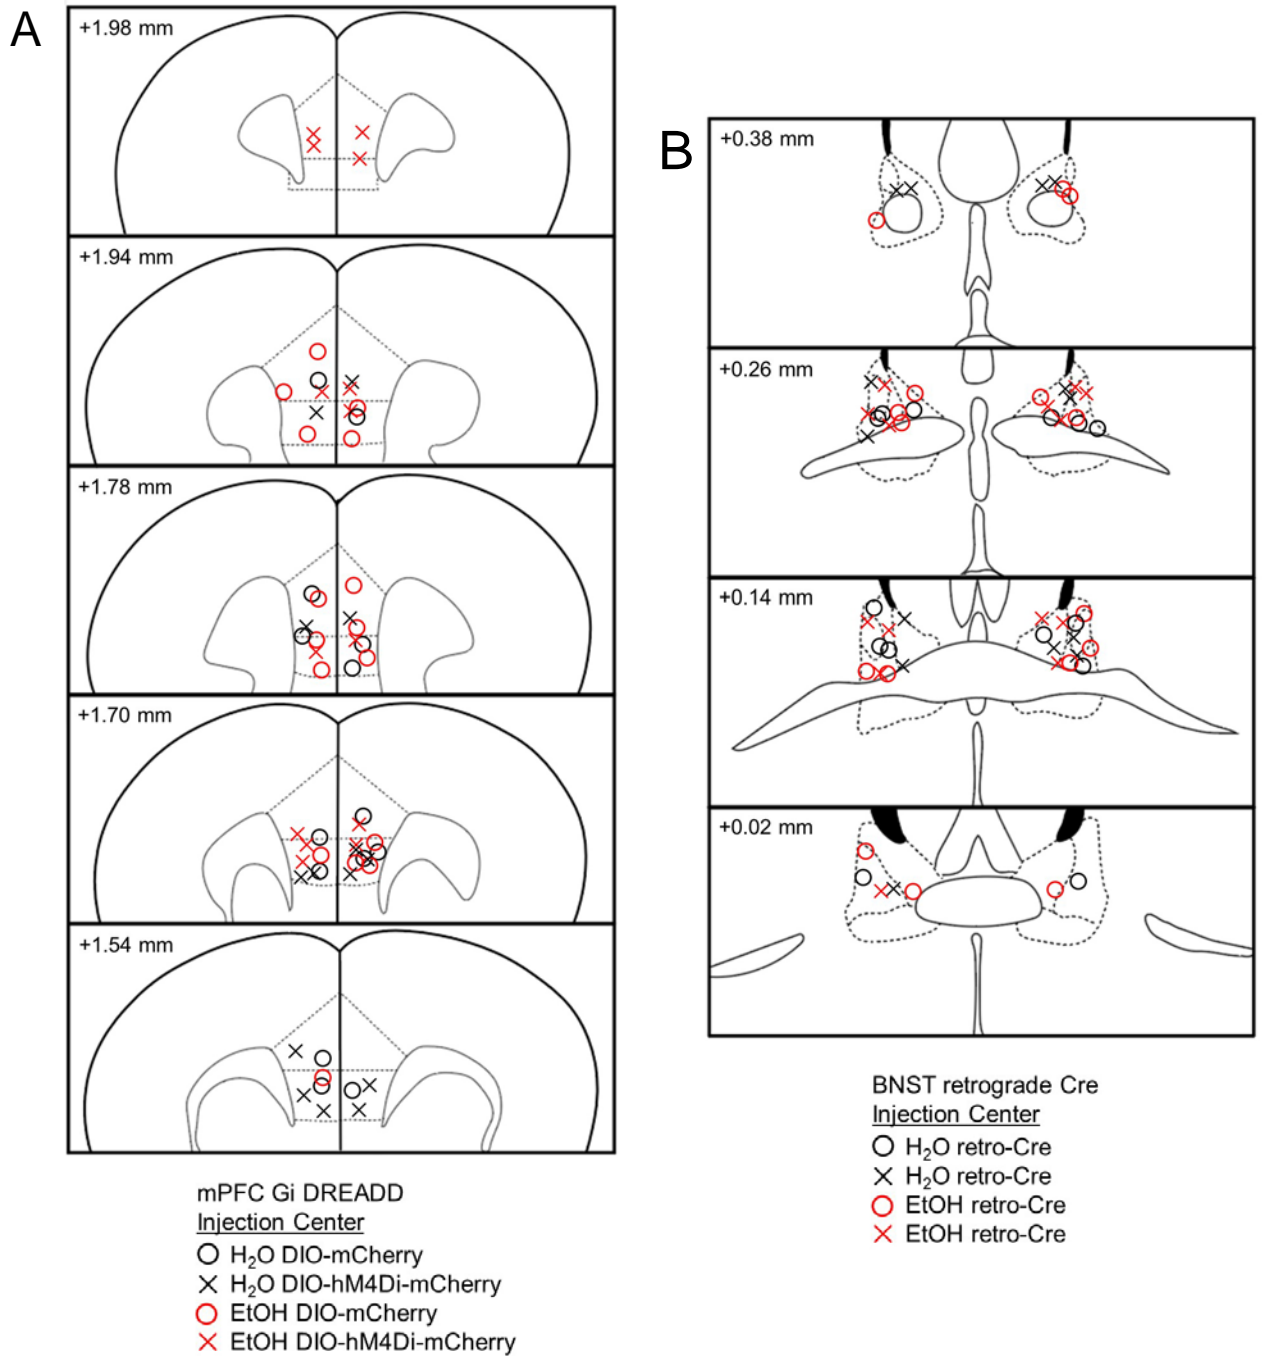

Supplement: supp [file elife-59709-supp-v1.zip › elife_poa_e59709_Figure_7_figure_supplement_1.pdf]
